# Supplementary material for: Stress-Induced Grain Refinement in Hard Magnetic Mn52Al45.7C2.3 Fabricated Using the Ball-Milling Method
Source: MDPI journal article supplement (doi:10.3390/ma15227919), 2022-11-09
Supplement: s1 [file s1]

*Supplementary material for*

# Stress-Induced Grain Refinement in Hard Magnetic $\text{Mn}_{52}\text{Al}_{45.7}\text{C}_{2.3}$ Fabricated Using the Ball-Milling Method

Seyed Nourallah Attyabi <sup>1</sup>, Seyed Mohammad Ali Radmanesh <sup>1</sup>, Seyyed Ali Seyyed Ebrahimi <sup>1,\*</sup>, Hossein Dehghan <sup>1</sup>, Zahra Lalegani <sup>1</sup> and Bejan Hamawandi <sup>2,\*</sup>

<sup>1</sup> Advanced Magnetic Materials Research Center, School of Metallurgy and Materials, College of Engineering, University of Tehran, Tehran 111554563, Iran

<sup>2</sup> Department of Applied Physics, KTH Royal Institute of Technology, SE-106 91 Stockholm, Sweden

\* Correspondence: saseyyed@ut.ac.ir (S.A.S.E.); bejan@kth.se (B.H.)

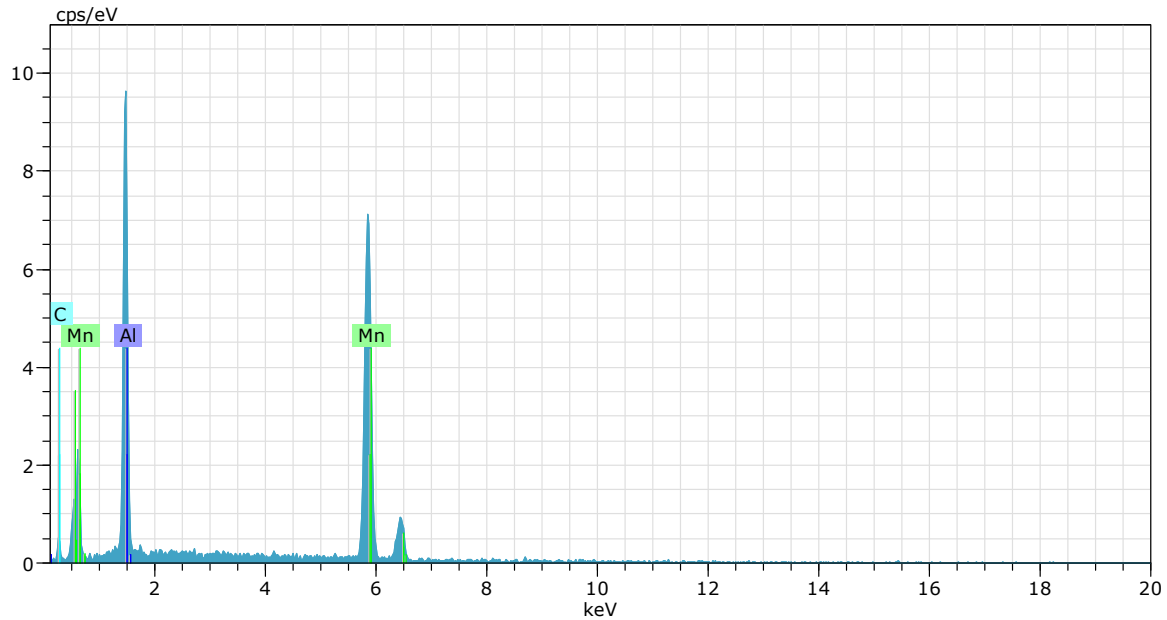

| El     | AN     | Series   | unn. C | norm. C | Atom. C | Error (1 Sigma) |
|--------|--------|----------|--------|---------|---------|-----------------|
| [wt.%] | [wt.%] |          | [at.%] |         | [wt.%]  |                 |
| Mn     | 25     | K-series | 48.93  | 62.43   | 37.01   | 1.56            |
| Al     | 13     | K-series | 20.25  | 25.84   | 31.18   | 1.11            |
| C      | 6      | K-series | 9.20   | 11.73   | 31.81   | 4.15            |
| -----  |        |          |        |         |         |                 |
| Total: |        |          | 78.38  | 100.00  | 100.00  |                 |

Figure S1. EDS analysis and weight percentage of Mn and Al for the region 1 of Figure 4.

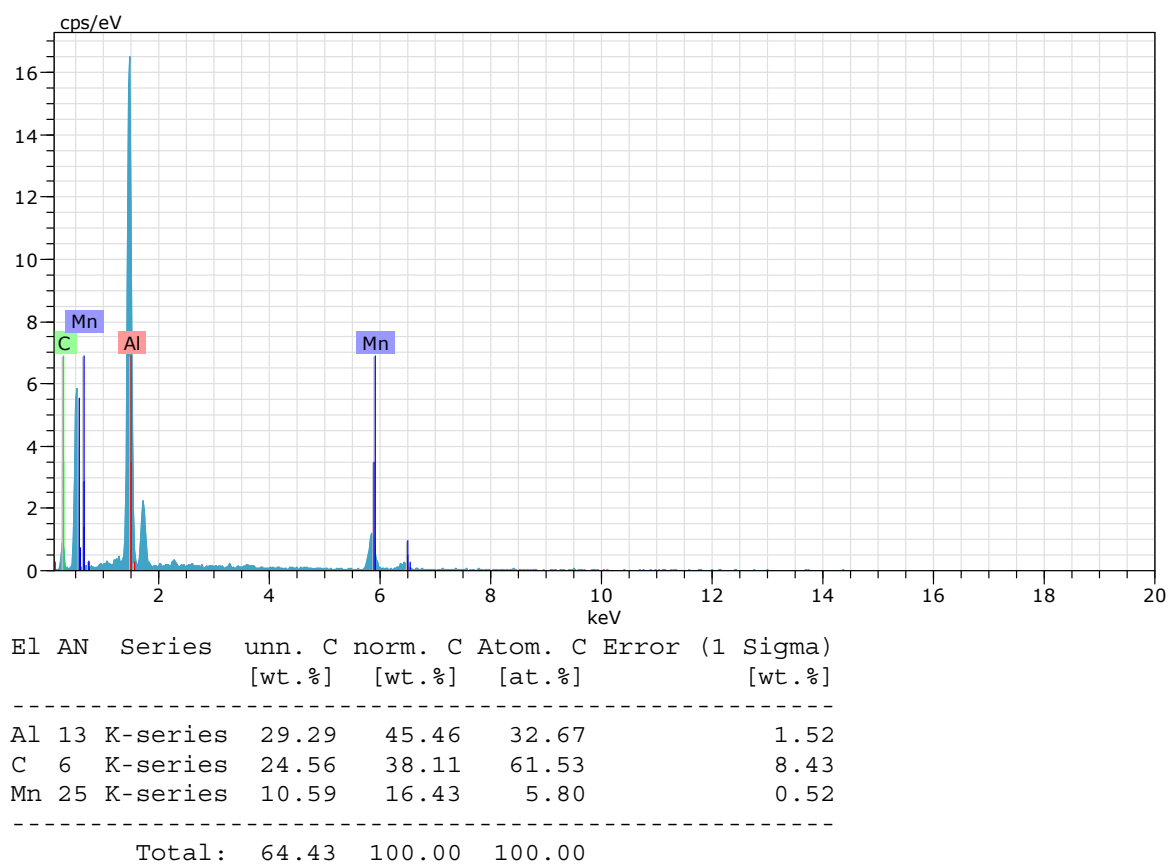

Figure S2. EDS analysis and weight percentage of Mn and Al for the region 2 of Figure 4.
